# Supplementary material
Source: Springer Nature journal article supplement (https://www.springermedizin.de/resource/supplementary/12885_2013_4127_MOESM1_ESM.pdf/9465272)
Supplement: MOESM1 [file 9465272]

| *Gene                                                               | PCR primer forward                          | PCR primer reverse                              | Tem. PCR (°C) | Pyrosequencing primer                                                                   | CpG number          |
|---------------------------------------------------------------------|---------------------------------------------|-------------------------------------------------|---------------|-----------------------------------------------------------------------------------------|---------------------|
| ABCB1_1<br>[GenBank:AY910577]<br>Nt 114132-114333<br>-859 to -657   | 5'<br>TTTTGGAAATTAATTTGT<br>TT              | 5'-Biotin-<br>CTACTTCTTAAACTTAA<br>AAAAACC      | 53            | 5'- GATTGGTTGGGTAGGA                                                                    | 7                   |
| ABCB1_2<br>[GenBank:AY910577]<br>Nt 114583-114800<br>-408 to -191   | 5'<br>TTAGATTAGGAGTTTTTG<br>GAGTAG          | 5'-Biotin-<br>AAAACAAAATAAAAAT<br>CTAACAC       | 58            | 5'- TGGTATTGGATTATGTTGT<br>5'- TGGTGGGAGGAAGT                                           | 10<br>10            |
| ABCB1_3<br>[GenBank:AY910577]<br>Nt 114826-115077<br>-165 to +186   | 5'<br>ATAGGAAAGTTTTGTAG<br>TGTTTAT          | 5'-Biotin-<br>CAAACATAATACCTTTTA<br>TTATTCATTTA | 58            | 5'- GGTTAGAGTAGTTGGGGTA<br>5'- AGAGGTTAGTTTTATTTTA<br>5'- TAAAAATAAAACAAAA              | 5<br>5<br>3         |
| BRCA1_1<br>[GenBank:AC135721]<br>Nt 32624-32929<br>-1508 to -1202   | 5'<br>GGTTAGTTTAGAGAGGGG<br>TTTTTATAG       | 5'-Biotin-<br>TCACACTAAAAAATTTA<br>AAAAAATTCAAA | 59            | 5'- GGGGTTTTTATAGYTAGTG<br>5' - GTATTTGAATTATAGATT<br>5'- ATTAAAAAGATTAGTTGT            | 10<br>6<br>3        |
| BRCA1_2<br>[GenBank:AC135721]<br>Nt 33805-34101<br>-324 to -30      | 5'<br>TTTTATGGTAAATTTAGGT<br>AGAATTTT       | 5'-Biotin-<br>TATCTAAAAACCCAC<br>AACATATC       | 58            | 5'- TTTGAGAGGTTGTTGTTAG<br>5'- GGGTGGTAAATTTAGAGTTT<br>5'- GGAATTATAGATAAATTTAA         | 11<br>4<br>6        |
| BRCA1_3<br>[GenBank:AC135721]<br>Nt 34447-34726<br>+302 to +593     | 5'<br>AGGAGTTTTAGATTAGTT<br>GATTAA          | 5'-Biotin-<br>CTAACACCTCTCTCCA<br>CAAAATC       | 58            | 5'- GAGTTTTAGATTAGTTGAT<br>5'-GGAGGTTGAGGTAGGAGA                                        | 5<br>8              |
| CDKN2A<br>[GenBank:AF527803]<br>Nt 19893-20154<br>+118to +380       | 5'<br>GAGGGGTTGGTTGGTTAT<br>TAGA            | 5'-biotin-<br>TACAAACCTCTACCCAC<br>CTAAAT       | 64            | 5'- GAGGGGAGAGTAGGTAG<br>5'- GGGGAGTAGTATGGAGTTT<br>5'- GGGYGGGTAGAGGA                  | 6<br>8<br>9         |
| ESR1_2<br>[GenBank:AY425004]<br>Nt 2426-2736<br>+449 to +759        | 5'<br>GTAGTTTAAGATTTTTTTG<br>GAG            | 5'-Biotin-<br>CCAAATAATAAAACACC<br>TACTAAC      | 61            | 5'- TATTTGGATAGTAGTAAGT<br>5'- YGTTAAYGYTAGGTT<br>5'- TTYGTTGATTTATTGTATT               | 13<br>8<br>5        |
| ESR1_3<br>[GenBank:AY425004]<br>Nt 2858-3201<br>+881 to +1224       | 5'-Biotin-<br>GGAGAAGGGAGAGTTTAG<br>GGAGTTG | 5'<br>ACCCCAACTTTAAATAC<br>CAAAAAC              | 66            | 5'- CCCCRAACTAAACC<br>5'- AAAATACRTTTTTTCAACT                                           | 13<br>11            |
| FOXC1_1<br>[EMBL:AL034344]<br>Nt 64529-64798<br>-1152 to -8568      | 5'-Biotin-<br>GGTTTTATTTTTTATTGG<br>TTGT    | 5'<br>CCTTCCAAAAACTCTAC<br>CCTAAAC              | 62            | 5'- GCRTCACCTTTTCTC                                                                     | 5                   |
| FOXC1_3<br>[EMBL:AL034344]<br>Nt 65513-65727<br>+354 to +568        | 5'<br>TAAGTAGGGTTGGTAGAA<br>TAGTATT         | 5'-Biotin-<br>ACAACCTATCTCTCCT<br>CCTTATC       | 62            | 5'- TTCGGATTTTTATAATATGT                                                                | 9                   |
| GSTP1_1<br>[GenBank:AY324387]<br>Nt 1670-1970<br>+3 to +304         | 5'<br>GAAAGAGGGAAAGGTTTT<br>TT              | 5'-biotin-<br>CCATACTAAAAACTCTAA<br>ACCCCATC    | 58            | 5'- GTAGTTTTYGTATTAGTGA<br>5'- GGATTATTTTTATAAGGT                                       | 6<br>8              |
| GSTP1_2<br>[GenBank:AY324387]<br>Nt 1670-1970<br>+3 to +304         | 5'-biotin-<br>GAAAGAGGGAAAGGTTTT<br>TT      | 5'<br>CCATACTAAAAACTCTAA<br>ACCCCATC            | 58            | 5'- CGAACCTATAAAAAAATC                                                                  | 7                   |
| IGF2 DMR2<br>[GenBank:AF517226]<br>Nt 7978-7724<br>+15856 to +16111 | 5'<br>GGGAAAGGGGTTTAGGAT<br>TTTTAT          | 5'-biotin-<br>ATAATTTACTCCCTTC<br>AACCTC        | 60            | 5'-GATTTTTATYGAAGTA<br>5'-GGGTYGATAYGTTTTTT<br>5'-TTTTATAGTATAGAGAGAT                   | 5<br>8<br>3         |
| MLH1<br>[GenBank:AY217549]<br>Nt 1504-1800<br>-564 to -268          | 5'<br>GGGAGGTTATAAGAGTAG<br>GGTTAA          | 5'-Biotin-<br>TCTCAACTCTATAAATTA<br>CTAAATCTCTC | 61.4          | 5'- GAGAGGAGGAGTTTGA<br>5'- TTTTATTGGTTGGATATT<br>5'- AAAACGAATTAATGAAGA                | 5<br>11<br>8        |
| PPP2R2B_1<br>[GenBank:AF152102]<br>Nt 1804-2020<br>-445 to -229     | 5'<br>AGGTAGGGAGTTAGGGGT<br>TTTG            | 5'-Biotin-<br>CTCTTCCCAACAACAT<br>AATAACC       | 62            | 5'- GGGGTTTTGGGTGT<br>5'- ATTTGAATTTGTAAGTTAGT<br>5'- AATGGAGGAGGATTTGA                 | 7<br>7<br>6         |
| PPP2R2B_3<br>[GenBank:AF152102]<br>Nt 3012-3336<br>+516 to +838     | 5'<br>AGTTTGTGTTAATGGAG<br>GAGGATAT         | 5'-Biotin-<br>AATCCCTAAAAACCAT<br>TAACCTC       | 62            | 5'-AAGGTAAYGTTAGTTT<br>5'- GGTTTTAGGGTTG<br>5'- CGGTAGTTTTAGTGTATT                      | 11<br>10<br>10      |
| PTEN_2<br>[GenBank:AF67844]<br>Nt 22468-22791<br>-98 to +227        | 5'<br>ATATTGGGTATGTTAGTA<br>GAGTTTG         | 5'-Biotin-<br>CAAACCTCCATCAACT<br>ACAACCTC      | 62            | 5'- TGGYGGGATTTTTTA<br>5'- TGGYGGGATTTTTTA<br>5'- TTTGGGGATTTTG<br>5'- TTYGTATTAGAGTTAT | 10<br>10<br>3<br>12 |
| PTEN_3<br>[GenBank:AF67844]<br>Nt 22893-23149<br>+586 to +843       | 5'<br>TTGTATTATTTTAGGGT<br>TGGGAA           | 5'-Biotin-<br>CTAAACCTACTCTCCTC<br>AACCAACC     | 60            | 5'- GTTGGTATATTTAGGGATT<br>5'- CGTYGGYGGAGGTA                                           | 13<br>6             |
| MGMT<br>[GenBank:X61657]<br>Nt 935-1133<br>-138 to +55              | 5'<br>GTTTTTTGTTTTTTTAGGTTT                 | 5'-Biotin-<br>AAACRACCCAAACACTCACC              | 60            | 5'- GTTTTYGTYYYTTTTAGATT<br>5'- AGGATATGTTGGGATAGTT                                     | 9<br>12             |
| RASSF1A<br>[GenBank:DQ444319]<br>Nt 599-789<br>-30 to +160          | 5'<br>AGTTTTGTATTTAGGTTTTATTG               | 5'-Biotin-<br>AACTCAATAAACTCAAACCTCCC           | 70.1          | 5'- GGATTTTGGGGGAGG<br>5'- TGTTAGYGTAAAGTTA                                             | 8<br>4              |

\* Transcription start site
